# Supplementary material for: Nanocavity-engineered Si/multi-functional carbon nanofiber composite anodes with exceptional high-rate capacities
Source: Royal Society of Chemistry journal article supplement (doi:10.1039/c4ta04257c), 2014-01-01
Supplement: c4ta04257c1.pdf [file c4ta04257c1.pdf]

## Nanocavity-engineered Si/multi-functional carbon nanofiber composite anodes

with exceptional high-rate capacities

Zheng-Long XU, Biao ZHANG, Sara ABOUALI, Mohammad AKBARI  
GARAKANI, Jiaqiang HUANG, Jian-Qiu HUANG and Jang-Kyo KIM\*

Department of Mechanical Aerospace Engineering, The Hong Kong University of  
Science and Technology, Clear Water Bay, Kowloon, Hong Kong

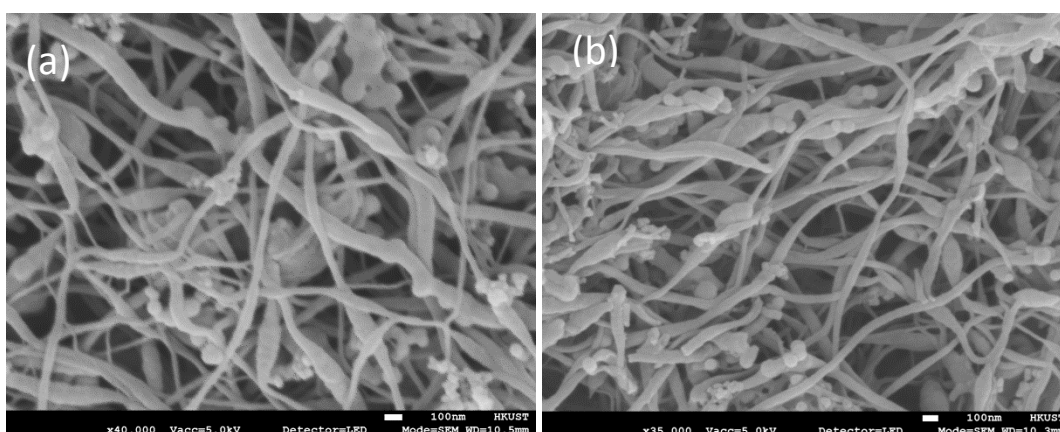

Fig. S1 SEM images of (a) Si/Fe/CNF and (b) C-Si/F-CNF.

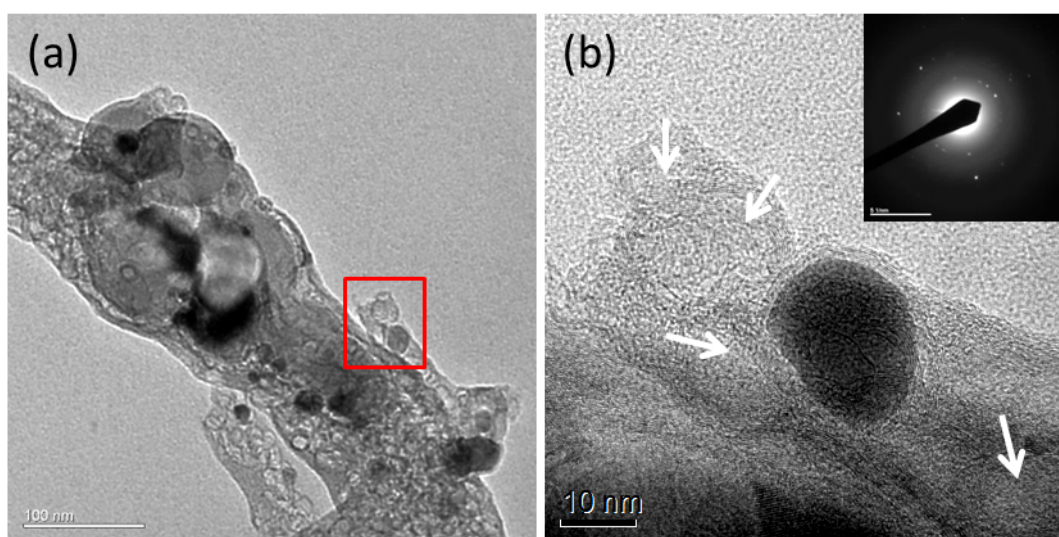

Fig. S2 HRTEM images of Si/Fe/CNF: white arrows in (b) present mesopores formed around Fe<sub>3</sub>C particles and the inset SAED image corresponds to Fe<sub>3</sub>C.

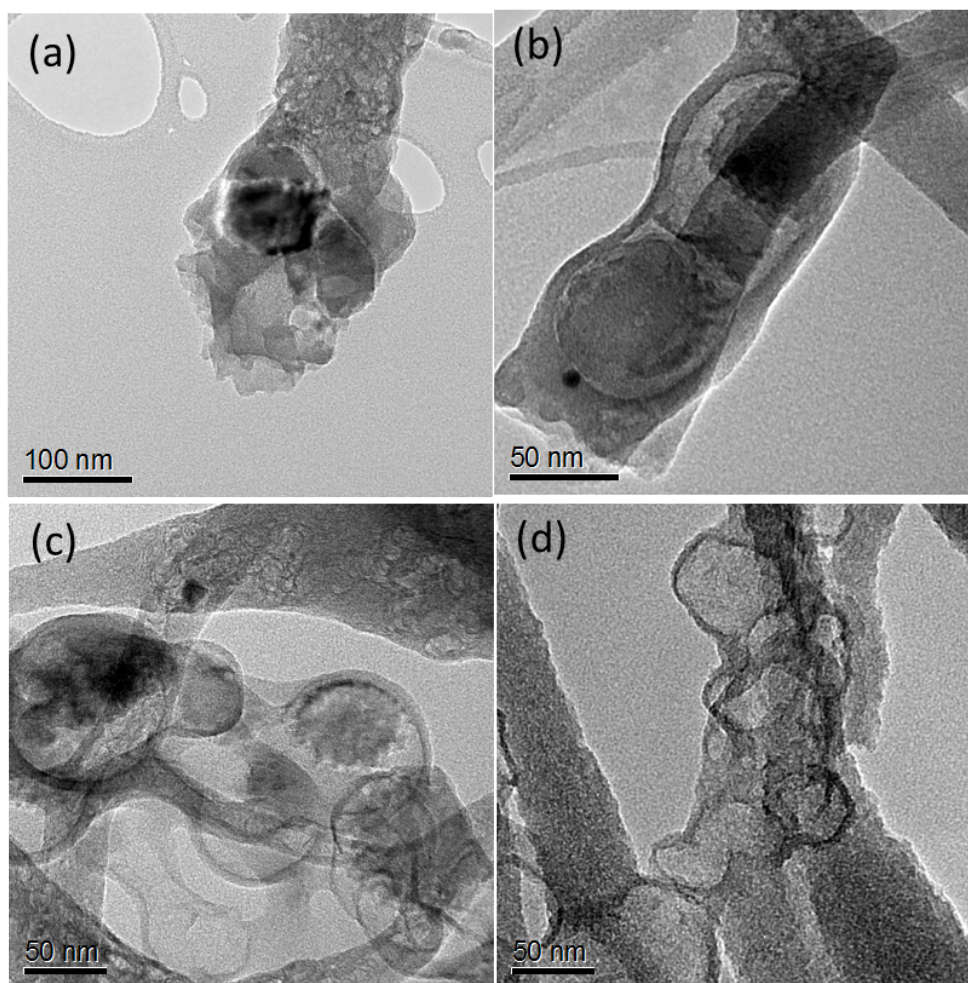

**Fig. S3** TEM images of C-Si/F-CNF after etching different durations of (a) 15; (b) 30; (c) 45; and (d) 60 min.

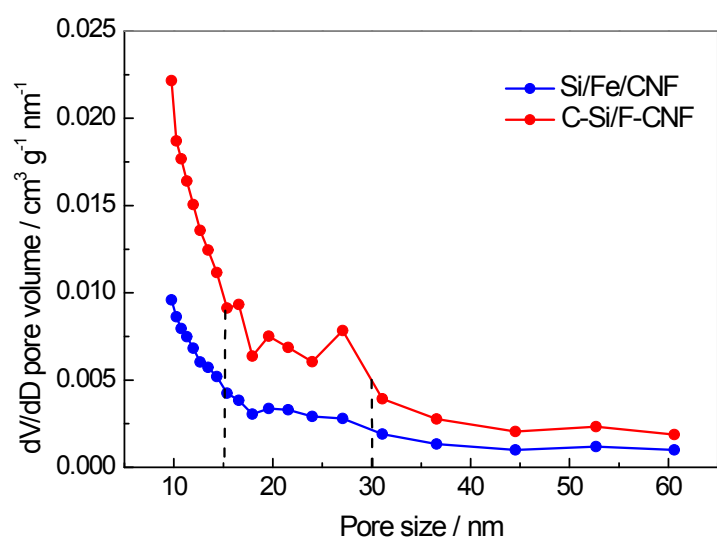

**Fig. S4** BJH pore size distributions ranging from 10 to 60 nm of Si/Fe/CNF and C-Si/F-CNF.

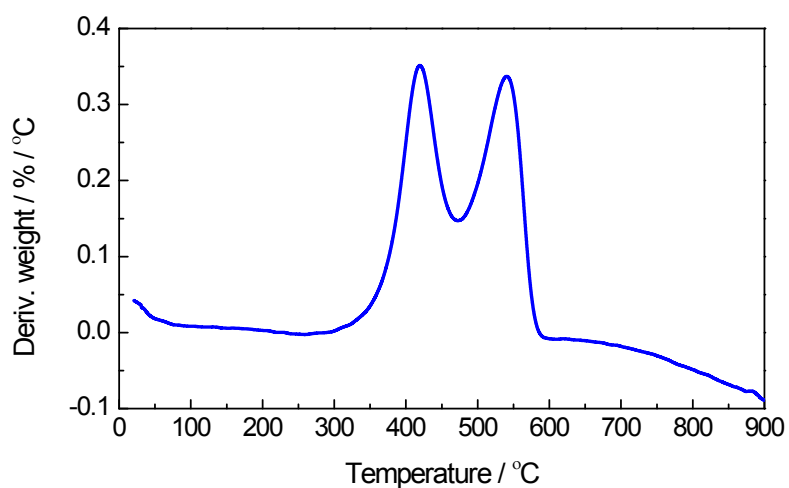

**Fig. S5** Differential thermal analysis (DTA) curve of Si/Fe/CNF.

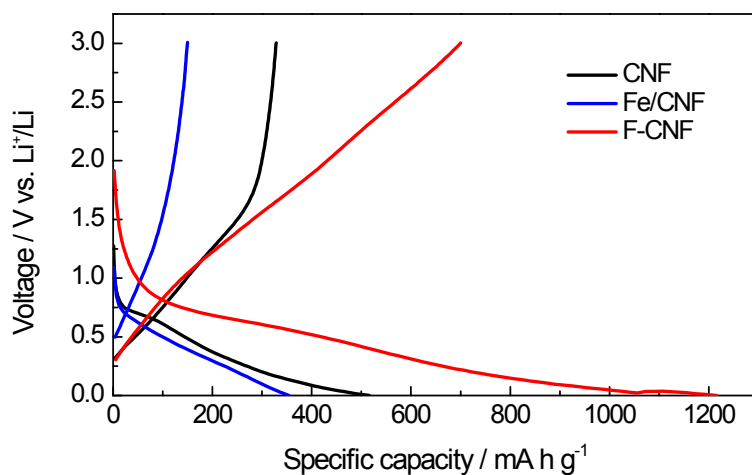

**Fig. S6** Initial charge/discharge profiles of CNF, Fe/CNF and F-CNF at  $0.5 \text{ A g}^{-1}$ . The electrochemically inert  $\text{Fe}_3\text{C}$  in Fe/CNF significantly decreased the capacity of CNF, while the functionalized CNF (F-CNF) delivered a much higher original capacity than that of CNF due to the additional Li ion sites.<sup>25</sup>

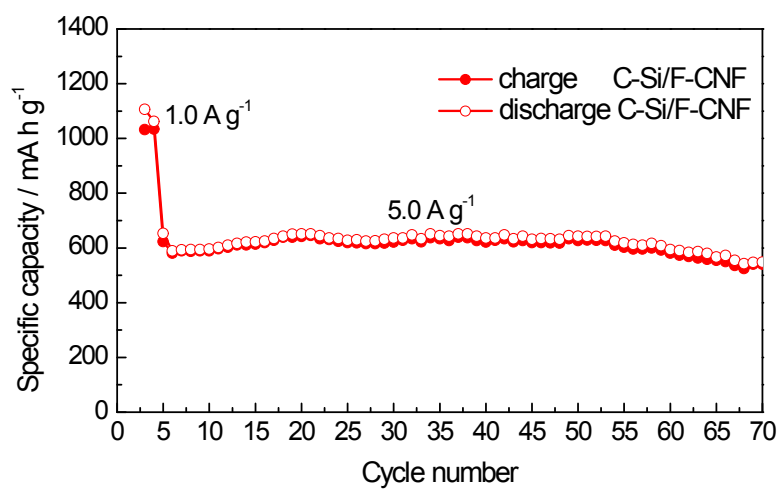

**Fig. S7** High rate capacities of C-Si/F-CNF electrode measured at 5.0 A g<sup>-1</sup> for 70 cycles.
